# Supplementary material for: Potential Inhibitors of Lumpy Skin Disease’s Viral Protein (DNA Polymerase): A Combination of Bioinformatics Approaches
Source: MDPI journal article supplement (doi:10.3390/ani14091283), 2024-04-24
Supplement: s1 [file s1]

Table S1: LSDV DNA replicating genes and their proteins.

| <b>Genes</b> | <b>Protein names</b>                    | <b>Functions</b> | <b>References</b>          |
|--------------|-----------------------------------------|------------------|----------------------------|
| LSDV020      | Ribonucleotide reductase, small subunit | DNA replication  | UniProt Id.Q91MY6; [2]     |
| LSDV039      | DNA polymerase                          | DNA replication  | UniProt Id.Q91MW8; [2]     |
| LSDV045      | DNA-binding phosphoprotein              | DNA replication  | UniProt Id.A0A1C9HI67; [2] |
| LSDV053      | Glutaredoxin-2                          | DNA replication  | UniProt Id.Q77GD7; [2]     |
| LSDV066      | Thymidine kinase                        | DNA replication  | UniProt Id.Q77GD2; [2]     |
| LSDV077      | DNA topoisomerase                       | DNA replication  | UniProt Id.Q77GC6; [2]     |
| LSDV082      | Uracil DNA glycosylase                  | DNA replication  | UniProt Id.Q91MT0; [2]     |
| LSDV083      | NTPase                                  | DNA replication  | UniProt Id.Q91MS9; [2]     |
| LSDV112      | DNA polymerase processivity factor      | DNA replication  | UniProt Id.Q91MQ0; [2]     |
| LSDV113      | DNA polymerase processivity factor      | DNA replication  | UniProt Id.A0A8E7SPL8; [2] |
| LSDV133      | DNA ligase                              | DNA replication  | UniProt Id.Q91MN1; [2]     |
| LSDV139      | Ser/Thr protein kinase                  | DNA replication  | UniProt Id.Q91MM5; [2]     |
